# Supplementary material for: QM/MM studies of the mechanism of unusual bifunctional fructose-1,6-bisphosphate aldolase/phosphatase
Source: Royal Society of Chemistry journal article supplement (doi:10.1039/c3cp55263b), 2014-01-01

## Supporting Information

### QM/MM studies on the mechanism of unusual bifunctional fructose-1,6-bisphosphate aldolase/phosphatase

Qianqian Hou<sup>†1,3</sup>, Xiang Sheng<sup>†1</sup>, Yongjun Liu<sup>\*1,2</sup>

<sup>1</sup>Key Lab of Colloid and Interface Chemistry, Ministry of Education, School of Chemistry and Chemical Engineering, Shandong University, Jinan, Shandong 250100, China

<sup>2</sup>Northwest Institute of Plateau Biology, Chinese Academy of Sciences, Xining, Qinghai 810001, China

<sup>3</sup>Shandong Nonmetallic Material Institute, Jinan, Shandong 250031, China

Figure S1

The crystal structures of FBPA/P (a) in FBPA form (PDB ID: 3R1M) and (b) in FBPP form (PDB ID: 1UMG).

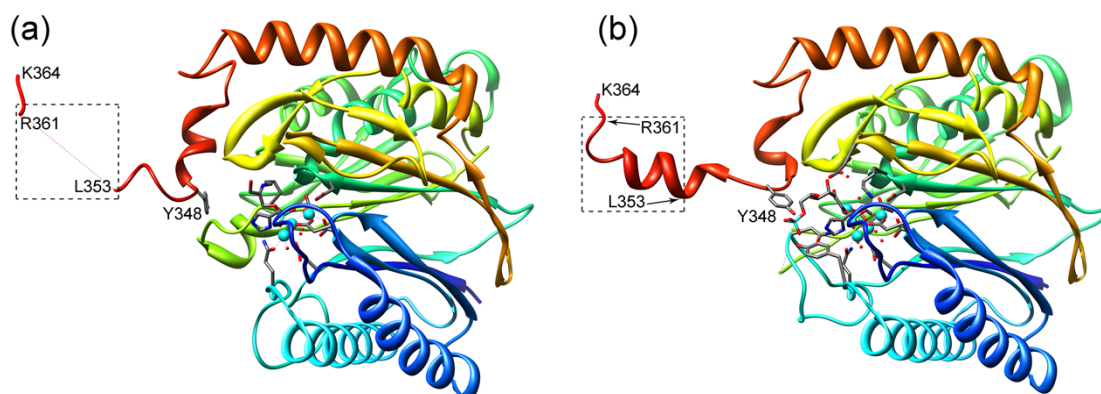

Figure S2

Time dependences of RMSDs (ps) from MD simulations. The RMSDs of two models to itself are present, and black line for DHAP-protein complex, red one for GA3P-protein complex.

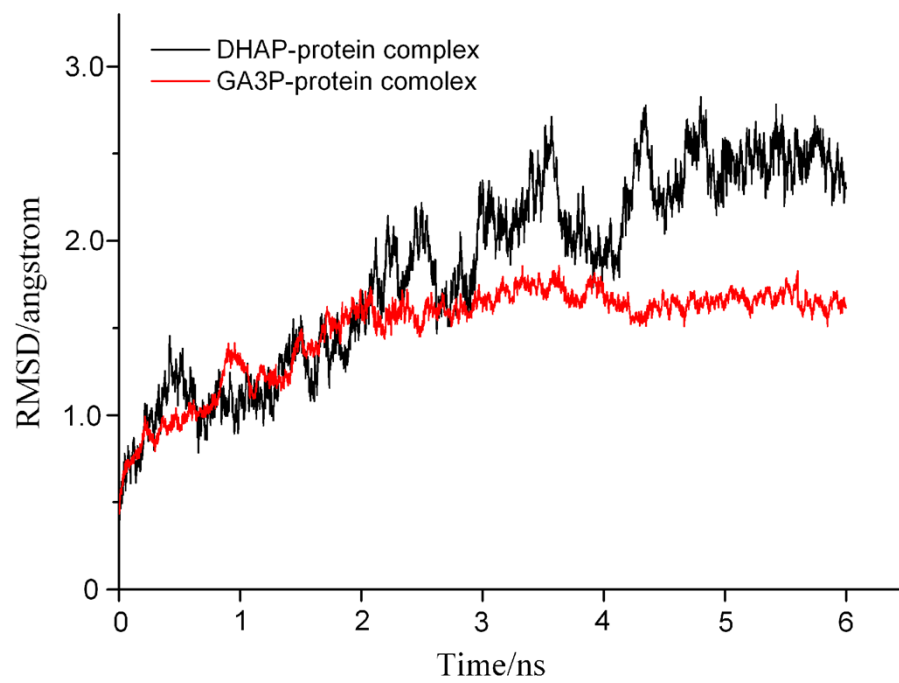

Supplement: c3cp55263b1.pdf [file c3cp55263b1.pdf]
